# Supplementary material
Source: Springer Nature journal article supplement (https://www.springermedizin.de/resource/supplementary/12978_2013_325_MOESM1_ESM.pdf/9602488)

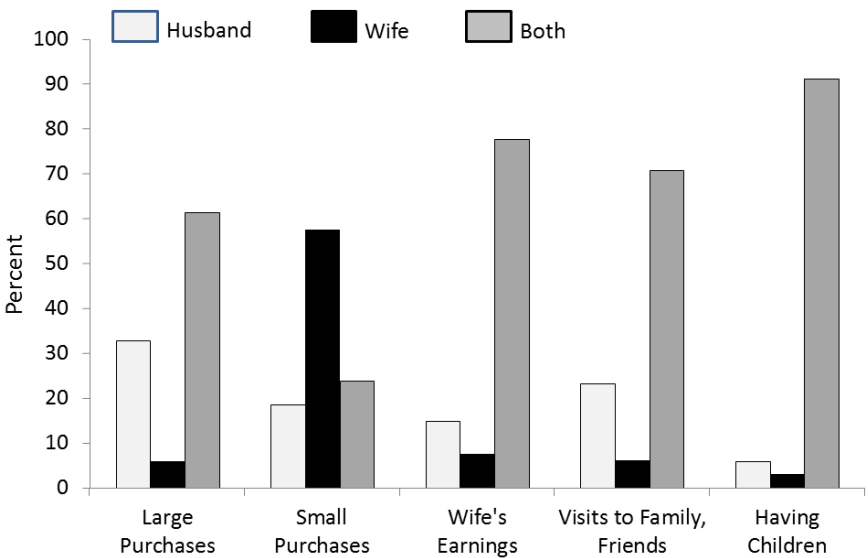

Supplement: MOESM1 [file 9602488]
